# Supplementary material
Source: PubMed Central journal article supplement (PMC509208)

**A**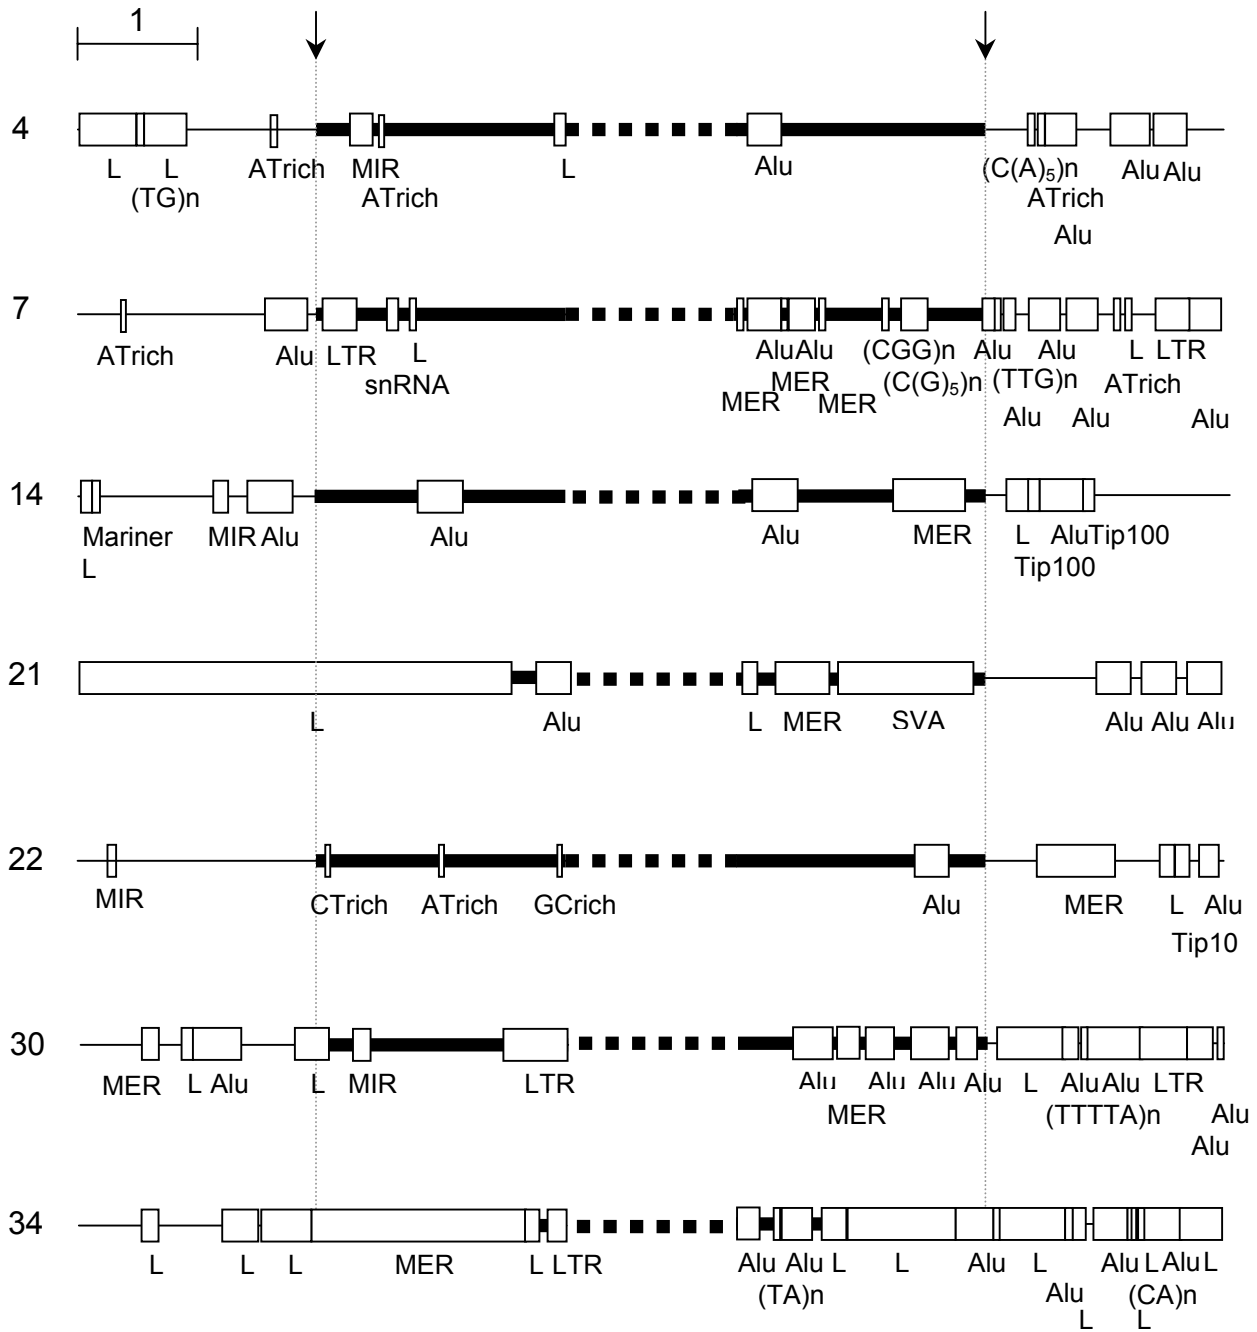**B**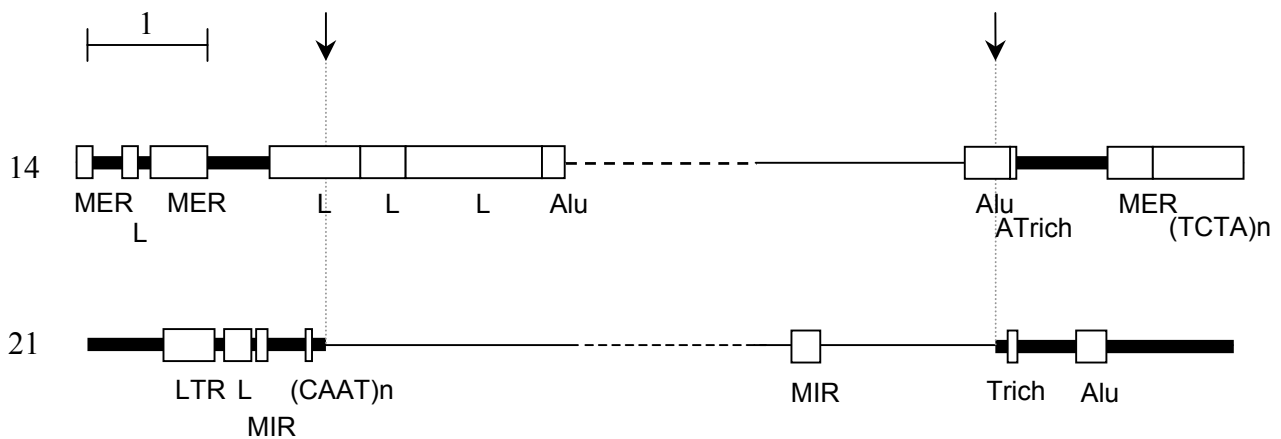

Supplement: pnas_101_31_11368__1.pdf [file pnas_101_31_11368__1.pdf]

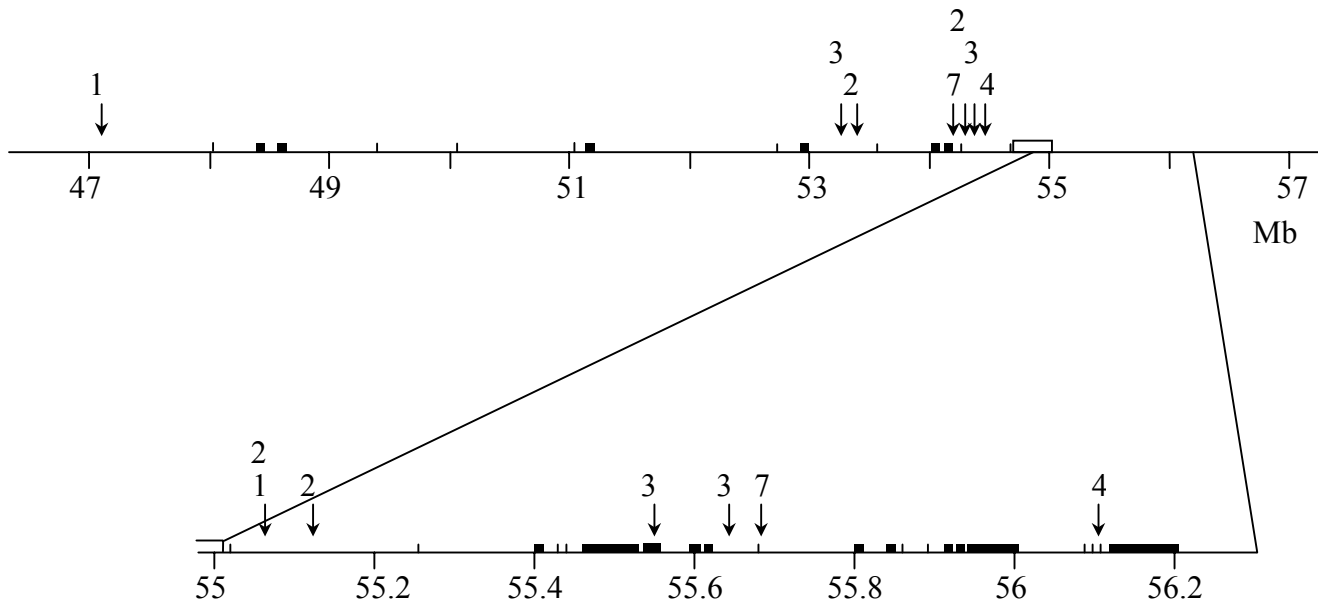

Supplement: pnas_101_31_11368__2.pdf [file pnas_101_31_11368__2.pdf]
